# Supplementary material for: Large-sized crystal growth and piezoelectric properties of the single crystals of LiNa5Mo9O30
Source: Royal Society of Chemistry journal article supplement (doi:10.1039/d0ce01822h), 2021-01-01
Supplement: d0ce01822h1.pdf [file d0ce01822h1.pdf]

## **Large-sized Crystal Growth and Piezoelectric properties of the single crystals $\text{LiNa}_5\text{Mo}_9\text{O}_{30}$**

Xiaoli Du, Fuan liu, Zeliang Gao\*, Xiaojie Guo, Xiangmei Wang, Youxuan Sun and Xutang Tao\*.  
State Key Laboratory of Crystal Materials & Institute of Crystal Materials, Shandong University,  
No. 27 Shanda South Road, Jinan 250100, P.R. China.

Email: [txt@sdu.edu.cn](mailto:txt@sdu.edu.cn), [gaozeliang@sdu.edu.cn](mailto:gaozeliang@sdu.edu.cn)

- 1. Table S1.** Local dipole moment calculation of five different  $\text{MoO}_6$  octahedrons
- 2.** Determination method of the spatial distribution of the piezoelectric coefficients

**1. Table S1.** Local dipole moment calculation of five different MoO<sub>6</sub> octahedrons

| MoO <sub>6</sub> (1) |      |         | Cart. Coord. |          |          | Distance                     | Unit vector                   |          |          |          | Dipole moment for each |                     |                    |
|----------------------|------|---------|--------------|----------|----------|------------------------------|-------------------------------|----------|----------|----------|------------------------|---------------------|--------------------|
| Z                    | Atom | Charges | X            | Y        | Z        | Å                            | x                             | y        | z        | Unitized | C <sub>grav</sub>      | C <sub>charge</sub> | u <sub>debye</sub> |
| 42                   | Mo01 | 6.09370 | 1.54036      | 12.98748 | 9.52190  |                              |                               |          |          |          |                        |                     |                    |
| 8                    | O1   | -1.676  | 0.62334      | 12.99900 | 11.00760 | 1.746                        | 0.52523                       | -0.00660 | -0.85094 | 1        | 0.16                   | 0.21227             | 19.96711           |
| 8                    | O00A | -0.537  | 3.40704      | 13.07330 | 8.44556  | 2.156                        | -0.86562                      | -0.03979 | 0.49912  | 1        | 0.16                   | 0.19209             | 14.76170           |
| 8                    | O00E | -1.642  | 0.37270      | 13.05472 | 8.27679  | 1.708                        | 0.68352                       | -0.03936 | 0.72887  | 1        | 0.16                   | 0.21169             | 19.30556           |
| 8                    | O00G | -1.186  | 2.14448      | 11.25366 | 9.41867  | 1.839                        | -0.32851                      | 0.94283  | 0.05614  | 1        | 0.16                   | 0.20371             | 17.39772           |
| 8                    | O00M | -0.849  | 2.16398      | 14.85875 | 9.48330  | 1.973                        | -0.31611                      | -0.94852 | 0.01957  | 1        | 0.16                   | 0.19772             | 15.98684           |
| 8                    | O1N  | -0.204  | 3.19108      | 12.99899 | 11.45824 | 2.544                        | -0.64874                      | -0.00453 | -0.76099 | 1        | 0.16                   | 0.18599             | 14.00178           |
|                      |      |         |              |          |          | Cell Volume                  | 4817.61                       |          |          |          | Dipole Moment          |                     | Magnitude          |
|                      |      |         |              |          |          | Z                            | 4                             | x        | y        | z        |                        |                     |                    |
|                      |      |         |              |          |          | <b>Total Dipole Moment =</b> | 0.00848 esu*cm/Å <sup>3</sup> | -8.9474  | -0.3032  | -4.9175  |                        | <b>10.2142</b>      | debye              |
| MoO <sub>6</sub> (2) |      |         | Cart. Coord. |          |          | Distance                     | Unit vector                   |          |          |          | Dipole moment for each |                     |                    |
| Z                    | Atom | Charges | X            | Y        | Z        | Å                            | x                             | y        | z        | Unitized | C <sub>grav</sub>      | C <sub>charge</sub> | u <sub>debye</sub> |
| 42                   | Mo02 | 6.11518 | 1.55039      | 16.78576 | 9.69713  |                              |                               |          |          |          |                        |                     |                    |
| 8                    | O00B | -1.680  | 0.50055      | 16.70291 | 11.08839 | 1.745                        | 0.60167                       | 0.04748  | -0.79733 | 1        | 0.16                   | 0.21244             | 20.01318           |
| 8                    | O00C | -0.434  | 3.42221      | 16.68545 | 8.46711  | 2.242                        | -0.83487                      | 0.04474  | 0.54862  | 1        | 0.16                   | 0.19030             | 14.45213           |
| 8                    | O00F | -1.560  | 0.48971      | 16.70625 | 8.33425  | 1.729                        | 0.61353                       | 0.04599  | 0.78833  | 1        | 0.16                   | 0.21037             | 18.99571           |
| 8                    | O00H | -1.314  | 2.12787      | 18.48614 | 9.61437  | 1.798                        | -0.32123                      | -0.94588 | 0.04604  | 1        | 0.16                   | 0.20607             | 17.96913           |
| 8                    | O00K | -0.397  | 3.05601      | 16.58031 | 11.39361 | 2.278                        | -0.66108                      | 0.09020  | -0.74488 | 1        | 0.16                   | 0.18963             | 14.34329           |
| 8                    | O00M | -0.730  | 2.16398      | 14.85875 | 9.48330  | 2.034                        | -0.30172                      | 0.94758  | 0.10514  | 1        | 0.16                   | 0.19567             | 15.53336           |
|                      |      |         |              |          |          | Cell Volume                  | 4817.611                      |          |          |          | Dipole Moment          |                     | Magnitude          |
|                      |      |         |              |          |          | Z                            | 4                             | x        | y        | z        |                        |                     |                    |
|                      |      |         |              |          |          | <b>Total Dipole Moment =</b> | 0.00709 esu*cm/Å <sup>3</sup> | -8.3110  | 1.4866   | -1.2768  |                        | <b>8.5389</b>       | debye              |
| MoO <sub>6</sub> (3) |      |         | Cart. Coord. |          |          | Distance                     | Unit vector                   |          |          |          | Dipole moment for each |                     |                    |
| Z                    | Atom | Charges | X            | Y        | Z        | Å                            | x                             | y        | z        | Unitized | C <sub>grav</sub>      | C <sub>charge</sub> | u <sub>debye</sub> |
| 42                   | Mo03 | 6.10514 | 3.61145      | 18.5753  | 7.99258  |                              |                               |          |          |          |                        |                     |                    |
| 8                    | O00B | -0.988  | 3.42221      | 16.68545 | 8.46710  | 1.958                        | 0.09667                       | 0.96535  | -0.24239 | 1        | 0.16                   | 0.20026             | 16.97853           |
| 8                    | O00B | -0.882  | 3.80069      | 20.46515 | 8.46710  | 1.958                        | -0.09667                      | -0.96535 | -0.24239 | 1        | 0.16                   | 0.19836             | 16.13845           |
| 8                    | O00H | -0.482  | 2.12787      | 18.37469 | 9.61437  | 2.207                        | 0.67218                       | 0.09089  | -0.73479 | 1        | 0.16                   | 0.19114             | 14.63868           |
| 8                    | O00H | -0.482  | 5.09503      | 18.66446 | 9.61437  | 2.200                        | -0.67441                      | -0.04053 | -0.73724 | 1        | 0.16                   | 0.19114             | 14.59008           |
| 8                    | O00J | -1.636  | 2.31133      | 18.72762 | 6.89254  | 1.710                        | 0.76037                       | -0.08908 | 0.64335  | 1        | 0.16                   | 0.21163             | 19.29326           |
| 8                    | O00J | -1.636  | 4.91157      | 18.42298 | 6.89254  | 1.710                        | -0.76037                      | 0.08908  | 0.64335  | 1        | 0.16                   | 0.21163             | 19.29326           |
|                      |      |         |              |          |          | Cell Volume                  | 4817.611                      |          |          |          | Dipole Moment          |                     | Magnitude          |
|                      |      |         |              |          |          | Z                            | 4                             | x        | y        | z        |                        |                     |                    |
|                      |      |         |              |          |          | <b>Total Dipole Moment =</b> | 0.00412 esu*cm/Å <sup>3</sup> | 0.0812   | 1.5502   | -4.7153  |                        | <b>4.9642</b>       | debye              |
| MoO <sub>6</sub> (4) |      |         | Cart. Coord. |          |          | Distance                     | Unit vector                   |          |          |          | Dipole moment for each |                     |                    |
| Z                    | Atom | Charges | X            | Y        | Z        | Å                            | x                             | y        | z        | Unitized | C <sub>grav</sub>      | C <sub>charge</sub> | u <sub>debye</sub> |
| 42                   | Mo04 | 6.09559 | 3.95172      | 10.99658 | 8.40588  |                              |                               |          |          |          |                        |                     |                    |
| 8                    | O00A | -0.616  | 3.40704      | 13.07330 | 8.44556  | 2.147                        | 0.25365                       | -0.96712 | -0.01848 | 1        | 0.16                   | 0.19353             | 15.38436           |
| 8                    | O00C | -0.259  | 2.30627      | 11.16004 | 6.59989  | 2.449                        | 0.67198                       | -0.06676 | 0.73755  | 1        | 0.16                   | 0.18701             | 14.02222           |
| 8                    | O00D | -1.560  | 3.55728      | 9.313655 | 8.36836  | 1.729                        | 0.228142                      | 0.97339  | 0.02170  | 1        | 0.16                   | 0.21027             | 18.96821           |

|                            |             |                |                     |                              |          |                               |                    |          |          |                               |                         |                           |                          |
|----------------------------|-------------|----------------|---------------------|------------------------------|----------|-------------------------------|--------------------|----------|----------|-------------------------------|-------------------------|---------------------------|--------------------------|
| 8                          | O00F        | -0.638         | 1.94729             | 11.25366                     | 9.41867  | 2.260                         | 0.88674            | -0.11373 | -0.44805 | 1                             | 0.16                    | 0.19392                   | 16.39411                 |
| 8                          | O00I        | -1.644         | 5.07987             | 11.16376                     | 9.67721  | 1.708                         | -0.66055           | -0.09788 | -0.74438 | 1                             | 0.16                    | 0.21173                   | 19.31496                 |
| 8                          | O00J        | -1.379         | 4.86173             | 11.28264                     | 6.90511  | 1.778                         | -0.51174           | -0.16086 | 0.84395  | 1                             | 0.16                    | 0.20712                   | 18.21319                 |
|                            |             |                |                     | Cell Volume                  | 4817.611 |                               | Dipole Moment      |          |          | Magnitude                     |                         |                           |                          |
|                            |             |                |                     | Z                            | 4        |                               | x                  | y        | z        |                               |                         |                           |                          |
|                            |             |                |                     | <b>Total Dipole Moment =</b> |          | 0.00966 esu*cm/A <sup>3</sup> | 10.1111            | -4.0362  | 4.1175   | <b>11.6395</b>                | debye                   |                           |                          |
| <b>MoO<sub>6</sub> (5)</b> |             |                | <b>Cart. Coord.</b> |                              |          | <b>Distance</b>               | <b>Unit vector</b> |          |          | <b>Dipole moment for each</b> |                         |                           |                          |
| <b>Z</b>                   | <b>Atom</b> | <b>Charges</b> | <b>X</b>            | <b>Y</b>                     | <b>Z</b> | <b>Å</b>                      | <b>x</b>           | <b>y</b> | <b>z</b> | <b>Unitized</b>               | <b>C<sub>grav</sub></b> | <b>C<sub>charge</sub></b> | <b>u<sub>debye</sub></b> |
| 42                         | Mo5         | 6.12640        | 4.02323             | 14.83832                     | 8.405345 |                               |                    |          |          |                               |                         |                           |                          |
| 8                          | O1          | -0.276         | 2.42906             | 14.86396                     | 6.51910  | 2.470                         | 0.64546            | -0.01038 | 0.76372  | 1                             | 0.16                    | 0.18744                   | 14.36452                 |
| 8                          | O2          | -1.097         | 3.40704             | 13.07330                     | 8.44556  | 1.870                         | 0.32952            | 0.94390  | -0.02151 | 1                             | 0.16                    | 0.20230                   | 17.07262                 |
| 8                          | O00B        | -0.914         | 3.42221             | 16.68545                     | 8.46711  | 1.943                         | 0.30926            | -0.95045 | -0.03178 | 1                             | 0.16                    | 0.19902                   | 16.30349                 |
| 8                          | O00C        | -1.756         | 5.14559             | 14.84538                     | 9.65746  | 1.682                         | -0.66747           | -0.00420 | -0.74463 | 1                             | 0.16                    | 0.21380                   | 19.81494                 |
| 8                          | O00E        | -0.547         | 2.16398             | 14.85875                     | 9.48330  | 2.149                         | 0.86507            | -0.00951 | -0.50155 | 1                             | 0.16                    | 0.19241                   | 14.85158                 |
| 8                          | O00L        | -1.537         | 4.99680             | 14.86396                     | 6.96974  | 1.735                         | -0.56121           | -0.01478 | 0.82754  | 1                             | 0.16                    | 0.21002                   | 18.91400                 |
|                            |             |                |                     | Cell Volume                  | 4817.611 |                               | Dipole Moment      |          |          | Magnitude                     |                         |                           |                          |
|                            |             |                |                     | Z                            | 4        |                               | x                  | y        | z        |                               |                         |                           |                          |
|                            |             |                |                     | <b>Total Dipole Moment =</b> |          | 0.00799 esu*cm/A <sup>3</sup> | 8.9467             | -0.0337  | 3.5337   | <b>9.6193</b>                 | debye                   |                           |                          |

## 2. Determination method of the spatial distribution of the piezoelectric coefficients

The orientation of the piezoelectric wafer corresponding to the maximum piezoelectric coefficient was obtained by the piezoelectric matrix changed with the coordination after two rotations. For different cut specimens, the piezoelectric matrix is transformed according to the Bond matrix (including M matrix and N matrix), which the Bond matrix is two 6×6 matrices related to the angle between each coordinate axis of the two coordinate systems. Considering that the cutting specimens are secondary rotation, the corresponding matrix  $d_{ij}''$  was obtained through following process and formula: first the matrix  $d_{ij}$  was rotated  $\theta$  around Y-axis and then rotated  $\varphi$  around Z-axis, where the coordinate transformation matrices rotating around Y-axis and Z-axis are  $[Ay]$  and  $[Az]$ , respectively, and the corresponding Bond matrices are  $[My]$ ,  $[Mz]$ ,  $[Ny]$  and  $[Nz]$ .

$$[d_{ij}''] = [Az][Ay][d][Ny][Nz]$$

In which:

$$[Ay] = \begin{bmatrix} \cos \theta & 0 & \sin \theta \\ 0 & 1 & 0 \\ -\sin \theta & 0 & \cos \theta \end{bmatrix}, \quad [Az] = \begin{bmatrix} \cos \varphi & -\sin \varphi & 0 \\ \sin \varphi & \cos \varphi & 0 \\ 0 & 0 & 1 \end{bmatrix}$$

$$[Ny] = \begin{bmatrix} \cos^2 \theta & 0 & \sin^2 \theta & 0 & \sin 2\theta & 0 \\ 0 & 1 & 0 & 0 & 0 & 0 \\ \sin^2 \theta & 0 & \cos^2 \theta & 0 & -\sin 2\theta & 0 \\ 0 & 0 & 0 & \cos \theta & 0 & -\sin \theta \\ -\sin \theta \cos \theta & 0 & \sin \theta \cos \theta & 0 & \cos^2 \theta - \sin^2 \theta & 0 \\ 0 & 0 & 0 & \sin \theta & 0 & \cos \theta \end{bmatrix},$$

$$[Nz] = \begin{bmatrix} \cos^2 \varphi & \sin^2 \varphi & 0 & 0 & 0 & -\sin 2\varphi \\ \sin^2 \varphi & \cos^2 \varphi & 0 & 0 & 0 & \sin 2\varphi \\ 0 & 0 & 1 & 0 & 0 & 0 \\ 0 & 0 & 0 & \cos \varphi & \sin \varphi & 0 \\ 0 & 0 & 0 & -\sin \varphi & \cos \varphi & 0 \\ \sin \varphi \cos \varphi & -\sin \varphi \cos \varphi & 0 & 0 & 0 & \cos^2 \varphi - \sin^2 \varphi \end{bmatrix}.$$
